# Supplementary material
Source: HighWire-hosted journal article supplement (https://injuryprevention.bmj.com/highwire/filestream/160615/field_highwire_adjunct_files/1/ip-2023-045071supp002_data_supplement.pdf)
Supplement: ip-2023-045071supp002_data_supplement.pdf [file ip-2023-045071supp002_data_supplement.pdf]

## বাংলাদেশের মোটর-বাইকারদের মধ্যে সড়ক নিরাপত্তা ব্যবস্থা সম্পর্কে জ্ঞান এবং অনুশীলন: একটি ক্রস-সেকশনাল গবেষণা

সাধন কুমার দাস<sup>১</sup>, তাহাজ্জিদ তামাননূর<sup>১</sup>, আরিফাতুন নেছা<sup>২</sup>, আব্দুল্লাহ আল-নোমান<sup>৩</sup>, পিউ দে<sup>৪</sup>,  
শুভজিত কুমার কুন্ডু<sup>৫</sup>, হাফিজা সুলতানা<sup>৬</sup>, বায়জিদ খুরশিদ রিয়াজ<sup>৬</sup>, এএনএম সামসুল ইসলাম<sup>২</sup>,  
গোলাম ছারোয়ার<sup>৭</sup>, বাবলু কুমার ধর<sup>৮</sup>, মোহাম্মদ মেসবাহউর রহমান<sup>৯\*</sup>

<sup>১</sup>স্বাস্থ্যশিক্ষা বিভাগ, জাতীয় প্রতিষেধক ও সামাজিক চিকিৎসা প্রতিষ্ঠান, মহাখালি, ঢাকা-১২১২, বাংলাদেশ।

<sup>২</sup>জনস্বাস্থ্য ও হাসপাতাল প্রশাসন বিভাগ, জাতীয় প্রতিষেধক ও সামাজিক চিকিৎসা প্রতিষ্ঠান, মহাখালি, ঢাকা-১২১২, বাংলাদেশ।

<sup>৩</sup>স্বাস্থ্য ও অধিকার, অগ্রগতি সংস্থা, সাতক্ষীরা-৯৪২০, বাংলাদেশ।

<sup>৪</sup>নার্সিং বিভাগ, জাতীয় ক্যান্সার গবেষণা ইনস্টিটিউট ও হাসপাতাল, মহাখালি, ঢাকা-১২১২, বাংলাদেশ।

<sup>৫</sup>স্বাস্থ্যসেবা বিভাগ, স্বাস্থ্য ও পরিবার কল্যাণ মন্ত্রণালয়, ঢাকা-১২১২, বাংলাদেশ।

<sup>৬</sup>স্বাস্থ্যশিক্ষা ও পরিবার কল্যাণ বিভাগ, স্বাস্থ্য ও পরিবার কল্যাণ মন্ত্রণালয়, মহাখালি, ঢাকা-১২১২, বাংলাদেশ।

<sup>৭</sup>কীটতত্ত্ব বিভাগ, জাতীয় প্রতিষেধক ও সামাজিক চিকিৎসা প্রতিষ্ঠান, মহাখালি, ঢাকা-১২১২, বাংলাদেশ।

<sup>৮</sup>বাবসায় প্রশাসন বিভাগ, মাহিদল বিশ্ববিদ্যালয়, ছালায়া-৭৩১৭০, থাইল্যান্ড।

<sup>৯</sup>জীব পরিসংখ্যান বিভাগ, জাতীয় প্রতিষেধক ও সামাজিক চিকিৎসা প্রতিষ্ঠান, মহাখালি, ঢাকা-১২১২, বাংলাদেশ।

**\*সংশ্লিষ্ট লেখক:** মোহাম্মদ মেসবাহউর রহমান, জীব পরিসংখ্যান বিভাগ, জাতীয় প্রতিষেধক ও সামাজিক চিকিৎসা প্রতিষ্ঠান, মহাখালি, ঢাকা-১২১২, বাংলাদেশ। মেইল: [meshbah037@gmail.com](mailto:meshbah037@gmail.com); যোগাযোগ নম্বর: +৮৮০১৭৫১৫০৯৮০১।

### সারাংশ:

**ভূমিকা:** সড়ক-দুর্ঘটনা বিশেষ করে মোটরবাইক দুর্ঘটনাজনিত জখম পুরো বিশ্বে মৃত্যুর অন্যতম প্রধান কারণ এবং বাংলাদেশের মতো নিম্ন ও মধ্যম আয়ের দেশগুলিতে গুরুতর উদ্বেগের বিষয়। সুতরাং, এই গবেষণার উদ্দেশ্য ছিল বাংলাদেশের রাজধানী ঢাকার মোটরবাইক চালকদের সড়ক নিরাপত্তা ব্যবস্থা সম্পর্কে জ্ঞান ও অভ্যাস যাচাই করা।

**কার্যপদ্ধতি:** এই ক্রস-সেকশনাল গবেষণাটি ২০২২ সালের জানুয়ারি থেকে ডিসেম্বর পর্যন্ত বাংলাদেশের রাজধানী ঢাকার ৩৫০ জন মোটরবাইকারের মধ্যে মুখোমুখি সাক্ষাৎকারের মাধ্যমে পরিচালিত হয়েছিল। যারা নিয়মিত মোটরসাইকেল চালান তাদের সড়ক নিরাপত্তা জ্ঞান এবং অভ্যাস সম্পর্কে একটি দুই-স্টেজ ক্লাস্টার স্যাম্পলিংয়ের মাধ্যমে সাক্ষাৎকার নেওয়া হয়েছিল। তথ্য-উপাত্ত বিশ্লেষণে ফ্রিকোয়েন্সি ডিস্ট্রিবিউশন, ইন্ডিপেন্ডেন্ট স্যাম্পল টি-টেস্ট, এবং ওয়ান-ওয়ে এনোভা ব্যবহৃত হয়েছিল।

**ফলাফল:** ৩৫০ জন মোটরবাইক চালকের মধ্যে মাত্র ৫৪.৬ শতাংশের সড়ক নিরাপত্তা বিধিসমূহ সম্পর্কে ভাল জ্ঞান ছিল এবং ১৬.৯ শতাংশের যথেষ্ট কম জ্ঞান ছিল। অধিকন্তু, অংশগ্রহণকারীদের মাত্র ৫০.৬ শতাংশ নিরাপত্তা ব্যবস্থাসমূহের যথাযথ অনুসরণ করেছেন যেখানে ২৩.৪ শতাংশ যথাযথ অনুসরণ করেননি। ওয়ান-

ওয়ে এনোভা বিশ্লেষণ দেখা গেছে যে উচ্চশিক্ষিত, অবিবাহিত এবং অধূমপায়ীদের মধ্যে সড়ক নিরাপত্তা বিধি জ্ঞান উল্লেখযোগ্যভাবে বেশি ছিল। উপরন্তু, উচ্চ শিক্ষিত, অধূমপায়ী এবং মুসলিম ব্যক্তির উল্লেখযোগ্যভাবে ( $p<0.05$ ) রাস্তার নিরাপত্তা ব্যবস্থাসমূহের যথাযথ অনুসরণ করেছেন।

**উপসংহার:** মোটরবাইক চালকদের মধ্যে সড়ক নিরাপত্তা ব্যবস্থার সামগ্রিক জ্ঞানের স্তর এবং চর্চা সন্তোষজনক ছিল না যদিও তাদের অধিকাংশই আলাদা আলাদা লক্ষণ ও নিয়মকানুন সম্পর্কে জানত। অতএব, এই গবেষণার ফলাফলের ভিত্তিতে সুপারিশ করা যায় যে, ট্র্যাফিক নিয়মকানুন বিষয়ক শিক্ষা ও তার কঠোর প্রয়োগ, সড়ক-নিরাপত্তা বিষয়ে মোটরবাইক চালকদের জ্ঞান এবং সঠিক চর্চা বৃদ্ধি করতে পারে যা ফলস্বরূপ সড়ক-দুর্ঘটনাজনিত আঘাত এবং প্রাণহানি কমিয়ে আনবে।

**প্রধান শব্দসমূহ:** জ্ঞান; চর্চা; সড়ক নিরাপত্তা ও বিধিসমূহ; সড়ক-দুর্ঘটনা; বাংলাদেশ
